# Changes in protein function underlies the disease spectrum in patients with CHIP mutations

Sabrina C. Madrigal<sup>\*,1</sup>, Zipporah McNeil<sup>\*,1</sup>, Chang-he Shi<sup>†,2</sup>, Cam Patterson<sup>‡,2</sup>, Kenneth Matthew Scaglione<sup>§,2</sup>, and Jonathan C. Schisler<sup>\*, \*\*, ✉</sup>

<sup>\*</sup>McAllister Heart Institute, The University of North Carolina at Chapel Hill, Chapel Hill, NC 27599, USA

<sup>†</sup>Department of Neurology, The First Affiliated Hospital of Zhengzhou University, Zhengzhou University, Zhengzhou, Henan, China

<sup>‡</sup>University of Arkansas for Medical Sciences, Little Rock, AR 72205, USA

<sup>§</sup>Department of Molecular Genetics and Microbiology, Duke University, Durham, NC 27710, USA

<sup>\*\*</sup>Department of Pharmacology and Department of Pathology and Lab Medicine, The University of North Carolina at Chapel Hill, Chapel Hill, NC 27599, USA

## Abstract

Monogenetic disorders that cause cerebellar ataxia are characterized by defects in gait and atrophy of the cerebellum, however, patients often suffer from a spectrum of disease, complicating treatment options. Spinocerebellar autosomal recessive 16 (SCAR16) is caused by coding mutations in *STUB1*, a gene that encodes the multi-functional enzyme CHIP (C-terminus of HSC70-interacting protein). The spectrum of disease found in SCAR16 patients includes a wide range in the age of disease onset, cognitive dysfunction, increased tendon reflex, and hypogonadism. Although SCAR16 mutations span the multiple functional domains of CHIP, it is unclear if the location of the mutation contributes to the clinical spectrum of SCAR16 or with changes in the biochemical properties of CHIP. In this study, we examined the associations and relationships between the clinical phenotypes of SCAR16 patients and how they relate to changes in the biophysical, biochemical, and functional properties of the corresponding mutated protein. We found that the severity of ataxia did not correlate with age of onset; however, cognitive dysfunction, increased tendon reflex, and ancestry were able to predict 54% of the variation in ataxia severity. We further identified domain-specific relationships between biochemical changes in CHIP and clinical phenotypes, and specific biochemical activities that associate selectively to either increased tendon reflex or cognitive dysfunction, suggesting that specific changes to CHIP-HSC70 dynamics contributes to the clinical spectrum of SCAR16. Finally, using linear models and Monte Carlo simulations, our data support the hypothesis that further inhibiting mutant CHIP activity lessens disease severity and may be useful in the design of patient-specific targeted approaches to treat SCAR16.

ataxia | aging | ubiquitin | protein quality control | modeling disease

<sup>1</sup>These authors contributed equally to this work

<sup>2</sup>These authors contributed equally to this work

Correspondence: [schisler@unc.edu](mailto:schisler@unc.edu)

## Introduction

Ataxia is a general term used to describe a loss of coordination. Ataxia can be caused by a variety of diseases, including metabolic disorders, vitamin deficiencies, peripheral neuropathy, cancer, or brain injuries. In addition to deterioration in movement and balance, ataxia can be accompanied by a spectrum of secondary disorders, including im-

pairments in speech, vision, and cognitive ability. Ataxia is most often caused by the progressive deterioration of the cerebellum, known as cerebellar ataxia (CA), of which there are several causes: hyperthyroidism, alcoholism, stroke, multiple sclerosis, and traumatic injury. Additionally, there are known genetic mutations that are thought to cause CA, and these forms of CA are classified by their inheritance patterns (1). CA mutations are inherited most commonly in an autosomal recessive manner (estimated prevalence is 7 per 100,000). CA can also manifest as an autosomal dominant disorder (estimated prevalence is 3 per 100,000), in addition to less prevalent X-linked or mitochondrial form of inheritance. Most forms of autosomal dominant CAs are caused by polyglutamine expansions within a protein coding region, in contrast to autosomal recessive CAs that are caused by conventional mutations within the coding region (1). The age of onset, prognosis, accompanying symptoms vary both among and within the genetic forms of CA, and importantly, there are currently no front-line medications for CA (2).

Spinocerebellar ataxia autosomal recessive 16 (SCAR16, MIM 615768) is a recessive form of cerebellar ataxia with a wide ranging disease spectrum, that can also include hypogonadism, cognitive dysfunction, dysarthria, and increased tendon reflex (2). Using whole exome sequencing, we identified a mutation in *STUB1* in two patients initially diagnosed with ataxia and hypogonadism (3). Subsequently, numerous clinical reports identified *STUB1* mutations in patients with ataxia, confirming our initial identification of a new disease (3–10). Remarkably, *STUB1* mutations were found in nearly 2% of Caucasian patients with degenerative ataxia, and these mutations appeared to be specific to the ataxia phenotype and not rare ubiquitous polymorphisms (8). *STUB1* encodes the multi-functional enzyme CHIP (C-terminus of HSC70-interacting protein), recognized as an active member of the cellular protein quality control machinery and has multiple functions as both a chaperone (11, 12), co-chaperone (13, 14), and ubiquitin ligase enzyme (15, 16). As a chaperone, CHIP can cause structural changes to proteins to either maintain solubility or increase specific activity. As a co-chaperone, CHIP directly interacts with heat shock proteins (HSP) and can aid in the stabilization and refolding of HSP-bound substrates. Conversely, as a ubiquitin ligase, CHIP

ubiquitinates terminally-defective proteins and targets them for degradation by the ubiquitin proteasome system.

SCAR16 mutations span the three functional domains of CHIP (Figure 1A): the N-terminal TPR domain that binds HSPs, the coiled-coiled domain that is important for dimerization, and the C-terminal Ubox domain that is responsible for the ubiquitin ligase function (2). Currently, it is not known if the location of these mutations mediate specific aspects of the SCAR16 spectrum. Equally so, it is not known how changes in CHIP properties caused by substitution mutations relate to clinical phenotypes. In this report, we combined clinical data provided by numerous reports and a recent report that characterized the biochemical repercussions of several of these SCAR16 disease mutations (Figure 1A) (17). Our approach allowed us to identify the specific biochemical changes to CHIP that are coupled to SCAR16 clinical characteristics. We developed linear models and used simulations to identify which properties of mutant CHIP proteins may impact disease severity. Defining the relationship between changes in specific features of CHIP and disease phenotypes may reveal new clues to both the spectrum of this disease, and ultimately, guide precision medicine-based strategies to treat SCAR16.

## Materials and Methods

**SCAR16 patient data.** Clinical data were obtained from published reports (Table S1) (3–10). One measure of disease severity is the score from the Scale for the Assessment and Rating of Ataxia (SARA). When SARA scores were not implicitly stated, SARA was imputed based on the clinical report as indicated in Table S1 (18).

**CHIP mutation data.** All biophysical and biochemical properties of CHIP proteins with disease-associated substitution mutations were obtained from published data (Table S2) (17). HSP70 ubiquitination at 37 °C or 25 °C was measured by densitometry analysis and represented by the total amount of HSP70 that was modified by ubiquitination; wild-type (WT) CHIP ubiquitinated 73% or 81% of the HSP70 total in the reaction, respectively.

**Statistical Analysis.** All analyses were performed using JMP Pro (v14.2.0). Continuous and categorical clinical variable distributions were analyzed using the Shapiro-Wilk W test or chi-squared test, respectively. Bivariate analysis was performed using either t test, one-way ANOVA, linear regression, or contingency analysis using Fisher's exact test, depending on the two variables being compared. A false discovery rate of <10% (Benjamini-Hochberg) was used to control for multiple test correction for each dependent variable (Table S3), with raw *P* values reported. Post hoc tests, when applicable, are described in the figure legends. Partial least squares regression was initially performed using all variables, using leave-one-out cross validation and then refined by retaining all variables with VIP values > 0.8 (19, 20). The model coefficients for the original data are provided in the corresponding data tables.

Monte Carlo simulations were performed by modeling SARA and age of onset using a multiple Y partial least squares regression equation using the indicated variables (19–22). Targets for SARA and age of onset improvement were set at one standard deviation from the mean. Simulations were run using all X variables as random with a normal distribution. 5000 baseline simulations were used to fit the original data. The simulation was adjusted to maximize desirability via an additional 5000 simulations to identify parameters that maximize improvement of both Y variables (23).

**Data Availability.** Table S1 contains clinical variables. Table S2 contains the biochemical data. Table S3 contains the adjusted *P* values. All supplementary files are available at the UNC digital repository, DOI: 10.17615/8dqf-e678.

## Results

**Clinical variable analyses from SCAR16 patients.** Phenotypic data were collated from multiple clinical reports, encompassing 24 patients (Table S1) (3–10). Several variables had skewed distributions (Table 2), most notably, hypogonadism was found in only four patients, whereas over 70% of the patients suffered from increased tendon reflex and/or cognitive dysfunction. There was nearly an equal number of males and females, as well as homozygous and hemizygous patients. The median clinical score for ataxia (SARA) was 18.5, a value associated with moderate dependence for daily activities (18), and the median age of onset was 17 years of age.

**Bivariate analysis.** We explored the co-penetrance of three reported SCAR16 clinical phenotypes, cognitive dysfunction, increased tendon reflex, and hypogonadism. There was no association between cognitive dysfunction and increased tendon reflex (Fisher's exact test, *P* = 1.000, suggesting that these two phenotypes are distinct from each other. Hypogonadism was only reported in four patients, limiting the power of the contingency analysis, however, all four patients with hypogonadism also had cognitive dysfunction (Fisher's exact test, *P* < 0.0001).

We next examined the relationship between two measures of disease severity, the age of onset and SARA, a reliable and valid clinical measure of ataxia (18). We hypothesized that more severe ataxia would correlate with an earlier age of onset. Counter to our hypothesis, there was no correlation between age of onset and ataxia (Figure 1B), indicating that these two variables were independent of each other. We further explored the relationships of age of onset and SARA with the other clinical variables reported in SCAR16 patients (Table 2). Patients with homozygous mutations had a reported disease onset 12 years earlier than patients with compound heterozygous mutations (Figure 1C). However, unlike other genetic forms of ataxia caused by trinucleotide repeats (24, 25), there were no associations between either homozygosity or age of onset with either SARA or any of the remaining clinical variables (Figure 1D, Table S2, S3). In contrast, when the associations between SARA and the re-

maining clinical variables were measured (Table 3), we found that SCAR16 patients with cognitive dysfunction scored 10 points higher on the SARA assessment (Figure 1E). Additionally, patients with European ancestry had the highest average SARA (Figure 1F, median = 32) whereas there was no difference between those with Han Chinese or Middle Eastern/North African ancestry (median = 15 and 14.5, respectively). These data demonstrate that SCAR16 patients with cognitive dysfunction had more severe deficits in motor function and that other genetic factors may potentially influence the effect of CHIP mutations on the severity of ataxia.

**Multivariate analysis.** Given the covariance structure of the patient variables and the mixture of continuous and nominal variables, we employed partial least squares regression to model ataxia severity (using SARA) as a function of the clinical characteristics. This modeling technique permits the usage of correlated explanatory phenotype variables in describing the distribution of SARA. Leave-one-out cross-validation identified three factors: ancestry, cognitive dysfunction, and tendon reflex (Figure 2A) that explained 54% of the variation in SARA (Figure 2B). Cognitive dysfunction had the largest estimate in the regression analysis (Equation 1, CD = cognitive dysfunction, TR = tendon reflex, Y = yes, N = no, EAS = East Asian ancestry, EUR = European ancestry). Also, European descent and increased tendon reflex contributed to higher SARA. Our model suggests that genetic factors associated with ancestry may influence the severity of SCAR16, even to a greater extent than homozygosity, age of onset, and sex, as these later variables did not contribute to the predictive power of the modeling (Table 3).

$$SARA_{adj} = 17.2 + [5.6(CD_Y), -5.6(CD_N)] + [4.7(EUR), 0.9(SAS), -1.4(MENA), -1.7(AMR), -3.4(EAS)] + [2.7(TR_Y), -2.7(TR_N)] \quad (1)$$

**Changes in CHIP biochemistry caused by SCAR16 mutations.** A recent study analyzed the effect of SCAR16 mutations on the properties of CHIP at the protein level (17). We used these data to look for relationships between various biophysical and biochemical properties to better understand the effect of these mutations on CHIP function. All continuous data were normally distributed except for  $K_D$ , which did not meet normalcy testing even after various transformations, therefore, all analyses were conducted using non-transformed data. As expected, there was a strong positive correlation between ubiquitin chain formation (a readout of the alignment between CHIP and the E2 enzyme) (17) and the extent of HSP70 ubiquitination ( $\rho = 0.64$ ). Also, HSP70 ubiquitination was inversely correlated with the  $K_D$  between CHIP and a peptide containing the HSP70 binding motif ( $\rho = -0.76$ ). We observed a positive correlation between  $B_{max}$  and  $K_D$  regarding CHIP interactions with the HSP70 peptide ( $\rho = 0.66$ ). This unexpected positive correlation suggests that some mutant CHIP proteins, including CHIP-T246M, may have an increased binding capacity towards chaperones, consistent with

our previous studies (3, 26). Throughout the initial correlation analyses (Figure 3A) the mutant CHIP proteins appeared to cluster based on the domain that harbors the mutation. This observation was confirmed via hierarchical clustering of mutant CHIP proteins and their corresponding biochemical parameters. Mutant proteins clustered primarily by the domain harboring the mutation (Figure 3B), consistent with the premise that the domain affected by the mutation may have differential actions on CHIP activities.

**The impact of the location of SCAR16 mutations on CHIP biochemistry.** We hypothesized that the location of the mutation would differentially impact the multiple functions of CHIP to either bind to chaperones and/or mediate polyubiquitin chain formation. To test this hypothesis, the variability in biochemical properties of CHIP mutations were tested for associations with the domain harboring the mutation. This analysis revealed three associations at a FDR < 10% (Table 4). First, binding studies between CHIP and the HSP70 tail peptide revealed that Ubox mutations had increased binding capacity towards HSP70 (Figure 3C); however, there was no difference in binding affinity across domains (Figure 3D). Further, as shown by (17), all mutant CHIP proteins maintained some capacity to polyubiquitinate HSP70, except for two Ubox mutants, M240T and T246M (Figure 3E). Moreover, every Ubox mutant had a reduced capacity to form polyubiquitin chains, perhaps due to altered interactions with E2 enzymes, whereas TPR and CC mutations were not defective in these same conditions (Figure 3F). These data suggest that Ubox mutations, in particular, affect functions that span both the co-chaperone and ubiquitin ligase functions of CHIP.

**Determining the relationship between patient phenotypes and the altered biochemical properties of mutant CHIP proteins.** Finally, we analyzed the clinical phenotypic data from SCAR16 patients and the corresponding biochemical characteristics of mutant CHIP proteins to determine if clinical variables were related to biochemical changes caused by the coding mutations. This approach has several limitations. First, only substitution mutations were characterized biochemically; therefore, phenotype-functional associations from indel mutations are not included in this analysis. Second, given the recessive and sometimes hemizygous nature of SCAR16, these analyses were performed on a per allele basis. Thus, in the case of hemizygous patients, this analysis cannot distinguish if one mutation has a more functional role than the other regarding the clinical manifestations of SCAR16. However, the majority of hemizygous genotypes include one allele that results in a pre-terminal stop codon, predicted to be degraded by non-sense mediated RNA decay (Table S1).

**Connecting the location of CHIP mutations with SCAR16 clinical variables.** Oneway ANOVA was used to measure the relationship between the domain location harboring the mutation and the continuous clinical variables. There was no association of either age of onset, SARA, or  $SARA_{adj}$  with



the domain location of the mutation ( $P = 0.51, 0.86$ , or  $0.14$ , respectively). However, there was a highly skewed distribution between the mutation location and cognitive dysfunction (Figure 4). Most notably, 94% of alleles with Ubox mutations associated with cognitive dysfunction, with no difference in the frequency of cognitive dysfunction between TRP or CC allele mutations (59% of TRP or CC alleles associated with cognitive dysfunction). In contrast, hypogonadism and increased tendon reflex were equally distributed in regards to the location of CHIP mutations (Fisher's exact test =  $0.15$  and  $1.00$ , respectively). These data suggest that domain-specific changes in CHIP function may contribute to the clinical spectrum of SCAR16, particularly Ubox mutations that are linked with cognitive dysfunction.

**Bivariate analysis of the biochemical changes caused by CHIP mutations with cognitive dysfunction and tendon reflex.** Changes in the biochemical properties of mutant CHIP may influence the clinical spectrum of SCAR16. As discussed above, there was no link between cognitive dysfunction and tendon reflex phenotypes in SCAR16 patients. As such, the relationships between the corresponding biochemical properties of mutant CHIP proteins encoded by disease alleles and these two independent phenotypes were analyzed.  $T_m$  and steady-state expression levels of mutant CHIP proteins did not associate with either cognitive dysfunction ( $P = 0.57$  and  $0.58$ ) or increased tendon reflex ( $P = 0.28$  or  $0.62$ ). However, cognitive dysfunction associated with 35% lower activity in CHIP/E2-mediated ubiquitin chain formation (Figure 5A), suggesting this activity is essential to maintain cerebellar cognition. CHIP functions primarily as a dimer, and seven of the 13 characterized mutations maintain oligomeric distributions similar to CHIP-WT (17). Interestingly, dimeric forms of mutant CHIP associated with increased tendon reflex (Figure 5B). Therefore, loss of ubiquitin ligase function may be a prominent contributor to cognitive dysfunction, whereas CHIP that still forms dimers, and perhaps some degree of altered CHIP function, may contribute to increased tendon reflex. Accordingly, aspects of the CHIP-HSC70 interaction changed reciprocally when compared to either cognitive dysfunction or tendon reflex. Alleles from SCAR16 patients with cognitive dysfunction had increased HSP70 binding capacity ( $\Delta = 14.3 \mu\text{mol per min}$ , (Figure 5C) with no change in  $K_D$  (Figure 5D). In contrast, alleles from SCAR16 patients with increased tendon reflex corresponded to mutant CHIP proteins with similar binding capacity (Figure 5E) and affinity to HSP70 (Figure 5F) as wild-type CHIP. Although only reaching marginal significance, we again observed opposite effects with cognitive dysfunction and tendon reflex regarding the ability of CHIP to ubiquitinate HSP70 (Figure 5G, 5H), effects that are consistent with the patterns in CHIP/E2-mediated ubiquitin chain formation (Figure 5A) and HSP70 binding (Figure 5C - 5F). Differential biochemical activities of CHIP linked with these clinical phenotypes support the concept that altered CHIP-HSC70 dynamics, caused by disease mutations, contribute to the clinical spectrum of SCAR16.

**Multivariate modeling of disease onset and SARA as a function of the biochemical properties of mutant CHIP.** We predicted that the biochemical changes to CHIP via disease mutations would affect both the age of onset and disease severity. First, bivariate analysis of age of onset and SARA with each of the biochemical properties of the mutant alleles (Table 5) identified that alleles encoding mutant CHIP proteins with lower activity and higher  $B_{\text{max}}$  associated with an earlier age of onset. Additionally, alleles encoding mutant CHIP proteins forming higher-order oligomers and reduced binding affinities associated with lower SARA scores. These data suggest that non-functional forms of CHIP (higher-order oligomers and decreased HSC70 binding affinity) results in less severe disease as opposed to mutant CHIP proteins that still maintain normal tertiary structure and binding activities towards chaperones. Multivariate linear models using partial least squares were developed for both age of onset (Figure 6A, Equation 2) and SARA (Figure 6B, Equation 3) as functions of the biochemical properties of mutant CHIP proteins.  $T_m$  and %expression were the only variables that did not contribute to the modeling of either onset or SARA (VIP > 0.8). The remaining five variables accounted for 70% of the variance in the age of onset; however, SARA modeling was less powerful, accounting for only 20% of the variance (Table 5).

$$\begin{aligned} \text{Onset}_{adj} = & 22.5 + [5.8(\text{oligomer}), -5.8(\text{dimer})] \\ & -0.3[(\%HSP70ub - 43.7)/15.5] \\ & +3.8[(\%chainformation - 69.9)/39.0] \quad (2) \\ & +0.5[(K_D - 7.8)/6.0] \\ & -4.5[(B_{\text{max}} - 212.0)/16.6] \end{aligned}$$

$$\begin{aligned} \text{SARA}_{adj2} = & 18.2 + [1.7(\text{oligomer}), -1.7(\text{dimer})] \\ & +0.7[(\%HSP70ub - 43.7)/15.5] \\ & +0.8[(\%chainformation - 69.9)/39.0] \quad (3) \\ & +0.9[(K_D - 7.8)/6.0] \\ & -0.7[(B_{\text{max}} - 212.0)/16.6] \end{aligned}$$

**Effects of CHIP stability on disease onset and severity.** One approach in designing therapies for SCAR16 would be to restore CHIP activity. Kanack et al. hypothesized that mutant CHIP proteins could be stabilized by decreasing the reaction temperature below the  $T_m$  of the mutant proteins (17). It was subsequently demonstrated that decreasing the reaction temperature to  $25^\circ\text{C}$ , partially recovered CHIP activities (17). Statistical analysis of these data demonstrated that decreasing the reaction temperature increased HSP70 ubiquitination (Figure 7A) and partially recovered some of the in vitro binding alterations seen in mutant CHIP proteins (Figure 7B, 7C). We used the data from experiments performed at  $25^\circ\text{C}$ , including HSP70 ubiquitination,  $K_D$ ,  $B_{\text{max}}$ , in the biochemical models of onset and SARA to examine the impact on these two phenotypes of SCAR16. Increasing mutant CHIP activity led to an earlier predicted age of onset (Figure 8A) with the mean of the model predictions equaling a six year lower age of onset (Figure 8B). Mutant CHIP parameters at  $25^\circ\text{C}$

had a less dramatic impact on SARA (Figure 8C) and predicted a small increase in SARA (Figure 8D). Considering the effects on both SARA and age of onset, the effect of increasing mutant CHIP activities, by lowering the reaction temperature, predicted a more severe disease.

Ultimately, we were interested in identifying changes in CHIP properties and activities that may result in delaying onset and decreasing severity (SARA). Monte Carlo simulations were performed using a combined partial least squares regression model of both age of onset and SARA, incorporating the four continuous biochemical variables identified in Table 4. The simulation that fit the original SCAR16 patient data indicated decreases in both ubiquitination-related activities and a modest reduction in binding affinity compared to wild-type CHIP (Table 6). Next, we set the improvement targets at one  $\sigma$  from the mean, equating to a 10.7 year increase in age of onset and a 10 point decrease in SARA. The results of the simulation were consistent towards both Y variables: further inhibiting mutant CHIP activity towards HSP70, either by decreasing HSP70 ubiquitination and/or reducing the binding affinity to HSP70, would both delay onset and severity of SCAR16 (Figure 9). The simulations predicted a delay in the age of onset by 7.2 years and an 8.2 point decrease in SARA by decreasing the affinity of mutant CHIP proteins to HSP70 to 17  $\mu$ M and decreasing the HSP70 ubiquitination to 7.2%, relative to wild-type CHIP (Table 6). Not surprisingly, there was a strong negative correlation between the amount of HSP70 ubiquitination and  $K_D$  of the CHIP-HSP70 interaction (Figure 3A,  $\rho = -0.76$ ), suggesting that blocking the interaction mutant CHIP with HSP70 represents a therapeutic opportunity that can be explored in future studies.

## Discussion

Mutations that cause SCAR16 span the three functional domains of the multi-functional enzyme CHIP (Figure 1A). Prior to this study, it was not known if the location of these mutations associate with specific aspects of the clinical spectrum exhibited by SCAR16 patients. Equally so, it was not known how changes in CHIP properties caused by substitution mutations related to clinical phenotypes.

First, we found that in addition to cognitive dysfunction and increased tendon reflex, genetic background may influence the severity of SCAR16 (Figure 1E & F, Figure 2A, and Table 3), whereas homozygosity was unrelated to ataxia severity (Figure 1D). It is possible that quality and access to health care and environmental factors could confound the observation of ancestry on SCAR16 severity, however, there could be other genetic factors that could lessen or exacerbate the loss or change in CHIP function. Identifying modifiers of CHIP function may provide additional therapeutic opportunities.

Ultimately, we were interested in identifying mutation-specific effects on CHIP function and the spectrum of SCAR16, and we found two primary classes of mutations. Overall, Ubox mutations had a more dramatic effect on the overall loss of CHIP function (Figure 3) and strongly associated with cognitive dysfunction in SCAR16 patients (Figure 4 and 5). In contrast, mutations with more modest effects on

CHIP function, primarily the mutations located in the TPR and CC domains, were linked to the increased tendon reflex seen in SCAR16 patients (Figure 5). Therefore, mutations that retain this intact, but slightly diminished activity towards HSP70, appear to drive the increased tendon reflex pathology.

These data allowed us to generate linear models (Figure 6 and Table 5) to both identify properties of CHIP that may be useful to target in SCAR16 patients and to test experimental data. The activity of several mutant CHIP proteins could be recovered by lowering the reaction temperature (Figure 7), however, our models predicted that mutants with higher activities resulted in more severe disease phenotypes (Table 3). As such, the experimental data of increased mutant CHIP activity also predicted an earlier age of onset and more severe ataxia (Figure 8). Using a combined model of both age of onset and ataxia severity, our simulation results were consistent with the idea that inhibiting mutant CHIP interactions with HSP70 predict a later age of onset and less severe ataxia (Figure 9, and Table 6).

It remains unclear is why Ubox mutations, with disrupted ubiquitin-related activities, strongly associate with cognitive dysfunction. Ubox mutations also have higher  $B_{max}$ , and we previously observed that the Ubox mutant CHIP-T246M pulled down more HSC70 and HSP70 compared to CHIP-WT in multiple cell models, and in our engineered mouse line that expresses CHIP-T246M from the endogenous locus (3, 26). One possibility is that Ubox mutants still bind E2 enzymes, but the inability to transfer ubiquitin disrupts E2 function, and perhaps activity of E2 enzymes towards other E3 ligases. Alternatively, the propensity to form higher-order oligomers (17, 26) and changes in solubility (26) could also affect the function of proteins that still interact with Ubox mutants.

Overall, our data suggest that inhibiting the interaction between mutant CHIP and HSP70 chaperones could be used as a targeted approach in cognitively normal patients with TPR and CC domain mutations. In contrast, SCAR16 patients with cognitive dysfunction and Ubox mutations may benefit from the use of molecular chaperones to prevent the oligomerization of these mutant CHIP proteins. CHIP impacts several cellular pathways, and identifying the CHIP-dependent pathways that may contribute to the specific pathologies in SCAR16, such as necroptosis (27), IGF1 (28), mitophagy (29), autophagy (30, 31), or water balance (32), may also uncover therapeutically relevant targets. Additionally, gene therapy approaches are also be applicable to SCAR16. The obvious solution is to use gene editing approaches to correct these mutations, however, given the recessive nature of the disease, delivery of a functional copy of CHIP may also be beneficial (33, 34); alternatively, antisense oligonucleotide therapy that can downregulate mutant CHIP protein levels may also prove to be an effective approach (35).

Additional SCAR16 patients with new, uncharacterized mutations continue to be reported (9, 36–39), in addition to a possible variant that functions in a dominant manner (40). With additional clinical data and with the advent of new molecular, cellular, and preclinical models to study CHIP

function, it is likely that precision-based approaches could be developed based on the specific mutation or the specific loss of function. Finally, by looking more broadly at the various autosomal recessive ataxias, additional themes and targets that could be effective across multiple ataxia diseases may also come to light in the years to come (41).

## ACKNOWLEDGEMENTS

We thank members of the Schisler Laboratory, including Rebekah Sanchez-Hodge for a critical review of the manuscript, Kalleen Kelley, and the McAllister Heart Institute administration team. All authors approved the final version of the manuscript and agree to be accountable for all aspects of the work in ensuring that questions related to the accuracy or integrity of any part of the work are appropriately investigated and resolved. All persons designated as authors qualify for authorship, and all those who qualify for authorship are listed.

## Bibliography

1. Thomas D. Bird. Hereditary Ataxia Overview. In Margaret P. Adam, Holly H. Ardinger, Roberta A. Pagon, Stephanie E. Wallace, Lora JH Bean, Karen Stephens, and Anne Amemiya, editors, *GeneReviews*. University of Washington, Seattle, Seattle (WA), 1993.
2. Sarah M Ronnebaum, Cam Patterson, and Jonathan C Schisler. Emerging evidence of coding mutations in the ubiquitin-proteasome system associated with cerebellar ataxias. *Human Genome Variation*, 1:14018, October 2014. ISSN 2054-345X. doi: 10.1038/hgv.2014.18. 00005.
3. Chang-He Shi, Jonathan C. Schisler, Carrie E. Rubel, Song Tan, Bo Song, Holly McDonough, Lei Xu, Andrea L. Portbury, Cheng-Yuan Mao, Cadence True, Rui-Hao Wang, Qing-Zhi Wang, Shi-Lei Sun, Stephanie B. Seminara, Cam Patterson, and Yu-Ming Xu. Ataxia and hypogonadism caused by the loss of ubiquitin ligase activity of the U box protein CHIP. *Human Molecular Genetics*, 23(4):1013–1024, February 2014. ISSN 0964-6906. doi: 10.1093/hmg/ddt497. 00047.
4. Yuting Shi, Junling Wang, Jia-Da Li, Haigang Ren, Wenjuan Guan, Miao He, Weiqian Yan, Ying Zhou, Zhengmao Hu, Jianguo Zhang, Jingling Xiao, Zheng Su, Meizhi Dai, Jun Wang, Hong Jiang, Jifeng Guo, Yafang Zhou, Fufeng Zhang, Nan Li, Juan Du, Qian Xu, Yacen Hu, Qian Pan, Lu Shen, Guanghui Wang, Kun Xia, Zhuohua Zhang, and Beisha Tang. Identification of CHIP as a Novel Causative Gene for Autosomal Recessive Cerebellar Ataxia. *PLoS ONE*, 8(12), December 2013. ISSN 1932-6203. doi: 10.1371/journal.pone.0081884. 00025.
5. Conceição Bettencourt, Justo García de Yébenes, José Luis López-Sendón, Orr Shomroni, Xingqian Zhang, Shu-Bing Qian, Ingrid M. C. Bakker, Sasja Heetveld, Raquel Ros, Beatriz Quintans, María-Jesús Sobrido, Marianna R. Bevova, Shushant Jain, Marianna Bugiani, Peter Heutink, and Patrizia Rizzu. Clinical and Neuropathological Features of Spastic Ataxia in a Spanish Family with Novel Compound Heterozygous Mutations in STUB1. *Cerebellum (London, England)*, 14(3):378–381, June 2015. ISSN 1473-4230. doi: 10.1007/s12311-014-0643-7. 00003.
6. Marta Cordoba, Sergio Rodríguez-Quiroga, Emilia Mabel Gatto, Agustín Alurralde, and Marcelo Andrés Kauffman. Ataxia plus myoclonus in a 23-year-old patient due to STUB1 mutations. *Neurology*, 83(3):287–288, July 2014. ISSN 1526-632X. doi: 10.1212/WNL.0000000000000600. 00014.
7. Chantal Depondt, Simona Donatello, Nicolas Simonis, Myriam Rai, Roxane van Heurck, Marc Abramowicz, Marc D'Hooghe, and Massimo Pandolfo. Autosomal recessive cerebellar ataxia of adult onset due to STUB1 mutations. *Neurology*, 82(19):1749–1750, May 2014. ISSN 1526-632X. doi: 10.1212/WNL.0000000000000416. 00014.
8. Matthias Synofzik, Rebecca Schüle, Martin Schulze, Janina Gburek-Augustat, Roland Schweizer, Anja Schirmacher, Ingeborg Krägeloh-Mann, Michael Gonzalez, Peter Young, Stephan Züchner, Ludger Schöls, and Peter Bauer. Phenotype and frequency of STUB1 mutations: next-generation screenings in Caucasian ataxia and spastic paraplegia cohorts. *Orphanet Journal of Rare Diseases*, 9:57, April 2014. ISSN 1750-1172. doi: 10.1186/1750-1172-9-57. 00016.
9. Stefanie Nicole Hayer, Tine Deconinck, Benjamin Bender, Katrien Smets, Stephan Züchner, Selina Reich, Ludger Schöls, Rebecca Schüle, Peter De Jonghe, Jonathan Baets, and Matthias Synofzik. STUB1/CHIP mutations cause Gordon Holmes syndrome as part of a widespread multisystemic neurodegeneration: evidence from four novel mutations. *Orphanet Journal of Rare Diseases*, 12, February 2017. ISSN 1750-1172. doi: 10.1186/s13023-017-0580-x.
10. Ketil Heimdal, Monica Sanchez-Guixé, Ingvild Aukrust, Jens Bollerslev, Ove Bruland, Greg Eigner Jablonski, Anne Kjersti Erichsen, Einar Gude, Jeanette A Koht, Sigrd Erdal, Torunn Fiskerstrand, Bjørn Ivar Haukanes, Helge Boman, Lise Bjørkhaug, Chantal ME Talaksen, Per M Knappskog, and Stefan Johansson. STUB1 mutations in autosomal recessive ataxias – evidence for mutation-specific clinical heterogeneity. *Orphanet Journal of Rare Diseases*, 9, September 2014. ISSN 1750-1172. doi: 10.1186/s13023-014-0146-0. 00013.
11. Meredith F. N. Rosser, Erin Washburn, Paul J. Muchowski, Cam Patterson, and Douglas M. Cyr. Chaperone Functions of the E3 Ubiquitin Ligase CHIP. *Journal of Biological Chemistry*, 282(31):22267–22277, August 2007. ISSN 0021-9258, 1083-351X. doi: 10.1074/jbc.M700513200. 00116.
12. Jonathan C. Schisler, Carrie E. Rubel, Chunlian Zhang, Pamela Lockyer, Douglas M. Cyr, and Cam Patterson. CHIP protects against cardiac pressure overload through regulation of AMPK. *The Journal of Clinical Investigation*, 123(8):3588–3599, August 2013. ISSN 0021-9738. doi: 10.1172/JCI69080. 00024.
13. Carol A. Ballinger, Patrice Connell, Yaxu Wu, Zhaoyong Hu, Larry J. Thompson, Li-Yan Yin, and Cam Patterson. Identification of CHIP, a Novel Tetratricopeptide Repeat-Containing Protein That Interacts with Heat Shock Proteins and Negatively Regulates Chaperone Functions. *Molecular and Cellular Biology*, 19(6):4535–4545, June 1999. ISSN 0270-7306. 00784.
14. Qian Dai, Chunlian Zhang, Yaxu Wu, Holly McDonough, Ryan A. Whaley, Virginia Godfrey, Hui-Hua Li, Nageswara Madamanchi, Wanping Xu, Len Neckers, Douglas Cyr, and Cam Patterson. CHIP activates HSF1 and confers protection against apoptosis and cellular stress. *The EMBO Journal*, 22(20):5446–5458, October 2003. ISSN 0261-4189. doi: 10.1093/emboj/cdg529. 00259.
15. Jihong Jiang, Carol A. Ballinger, Yaxu Wu, Qian Dai, Douglas M. Cyr, Jörg Höfheld, and Cam Patterson. CHIP Is a U-box-dependent E3 Ubiquitin Ligase IDENTIFICATION OF Hsc70 AS A TARGET FOR UBIQUITYLATION. *Journal of Biological Chemistry*, 276(46):42938–42944, November 2001. ISSN 0021-9258, 1083-351X. doi: 10.1074/jbc.M101968200. 00507.
16. Geoffrey C. Meacham, Cam Patterson, Wenye Zhang, J. Michael Younger, and Douglas M. Cyr. The Hsc70 co-chaperone CHIP targets immature CFTR for proteasomal degradation. *Nature Cell Biology*, 3(1):100–105, January 2001. ISSN 1465-7392. doi: 10.1038/35050509. 00752.
17. Adam J. Kanack, Oliver J. Newsom, and Kenneth Matthew Scaglione. Most mutations that cause spinocerebellar ataxia autosomal recessive type 16 (SCAR16) destabilize the protein quality-control E3 ligase CHIP. *The Journal of Biological Chemistry*, 293(8):2735–2743, February 2018. ISSN 0021-9258. doi: 10.1074/jbc.RA117.000477.
18. T. Schmitz-Hübsch, S. Tezenas du Montcel, L. Baliko, J. Berciano, S. Boesch, C. Depondt, P. Giunti, C. Globas, J. Infante, J.-S. Kang, B. Kremer, C. Mariotti, B. Melegh, M. Pandolfo, M. Rakowicz, P. Ribai, R. Rola, L. Schöls, S. Szymanski, B. P. van de Warrenburg, A. Dürr, T. Klockgether, and Roberto Fancellu. Scale for the assessment and rating of ataxia: development of a new clinical scale. *Neurology*, 66(11):1717–1720, June 2006. ISSN 1526-632X. doi: 10.1212/01.wnl.0000219042.60538.92.
19. Paul H. Garthwaite. An interpretation of partial least squares. *Journal of the American Statistical Association*, 89(425):122–127, 1994.
20. Ian Cox and Marie Gaudard. *Discovering partial least squares with JMP*. SAS Institute, 2013.
21. Svante Wold, Michael Sjöström, and Lennart Eriksson. PLS-regression: a basic tool of chemometrics. *Chemometrics and intelligent laboratory systems*, 58(2):109–130, 2001.
22. L. Eriksson, T. Byrne, E. Johansson, J. Trygg, and C. Vikström. *Multi- and Megavariate Data Analysis Basic Principles and Applications*. Umetrics Academy, July 2013. ISBN 978-91-973730-5-0. Google-Books-ID: 58qLBQAQBAJ.
23. George Derringer and Ronald Suich. Simultaneous optimization of several response variables. *Journal of quality technology*, 12(4):214–219, 1980.
24. Kazumasa Soga, Kinya Ishikawa, Tokuro Furuya, Tadatsune Iida, Tetsuo Yamada, Noboru Ando, Kiyobumi Ota, Hiromi Kanno-Okada, Shinya Tanaka, Masayuki Shintaku, Yoshinobu Eishi, Hidehiro Mizusawa, and Takanori Yokota. Gene dosage effect in spinocerebellar ataxia type 6 homozygotes: A clinical and neuropathological study. *Journal of the Neurological Sciences*, 373:321–328, February 2017. ISSN 1878-5883. doi: 10.1016/j.jns.2016.12.051.
25. Xian-Jin Shang, Hao-Ling Xu, Jin-Shan Yang, Ping-Ping Chen, Min-Ting Lin, Mei-Zhen Qian, Hui-Xia Lin, Xiao-Ping Chen, Yu-Chao Chen, Bin Jiang, Yi-Jun Chen, Wan-Jin Chen, Ning Wang, Zhi-Ming Zhou, and Shi-Rui Gan. Homozygote of spinocerebellar ataxia type 3 correlating with severe phenotype based on analyses of clinical features. *Journal of the Neurological Sciences*, 390:111–114, 2018. ISSN 1878-5883. doi: 10.1016/j.jns.2018.04.026.
26. Chang-he Shi, Carrie Rubel, Sarah E. Soss, Rebekah Sanchez-Hodge, Shuo Zhang, Sabrina C. Madrigal, Saranya Ravi, Holly McDonough, Richard C. Page, Walter J. Chazin, Cam Patterson, Cheng-yuan Mao, Monte S. Willis, Hui-Yang Luo, Yu-sheng Li, Donte A. Stevens, Mi-bo Tang, Pan Du, Yao-he Wang, Zheng-wei Hu, Yu-ming Xu, and Jonathan C. Schisler. Disrupted structure and aberrant function of CHIP mediates the loss of motor and cognitive function in preclinical models of SCAR16. *PLoS Genetics*, 14(9), September 2018. ISSN 1553-7390. doi: 10.1371/journal.pgen.1007664.
27. Jinho Seo, Eun-woo Lee, Hyerim Sung, Daehyeon Seong, Yves Dondelinger, Jihye Shin, Manhyung Jeong, Hae-Kyung Lee, Jung-Hoon Kim, Su Yeon Han, Cheolju Lee, Je Kyung Seong, Peter Vandenabeele, and Jaewhan Song. CHIP controls necroptosis through ubiquitylation- and lysosome-dependent degradation of RIPK3. *Nature Cell Biology*, 18(3):291–302, March 2016. ISSN 1476-4679. doi: 10.1038/ncb3314.
28. Riga Tawo, Wojciech Pokrzywa, Éva Kevei, Melek E. Akyuz, Vishnu Balaji, Svenja Adrian, Jörg Höfheld, and Thorsten Hoppe. The Ubiquitin Ligase CHIP Integrates Proteostasis and Aging by Regulation of Insulin Receptor Turnover. *Cell*, 169(3):470–482.e13, April 2017. ISSN 0092-8674. doi: 10.1016/j.cell.2017.04.003.
29. Britney N. Lizama, Amy M. Palubinsky, Vineeth A. Raveendran, Annah M. Moore, Joel D. Federspiel, Simona G. Codreanu, Daniel C. Liebler, and BethAnn McLaughlin. Neuronal Preconditioning Requires the Mitophagic Activity of C-terminus of HSC70-Interacting Protein. *The Journal of Neuroscience: The Official Journal of the Society for Neuroscience*, June 2018. ISSN 1529-2401. doi: 10.1523/JNEUROSCI.0699-18.2018.
30. Saranya Ravi, Traci L. Parry, Monte S. Willis, Pamela Lockyer, Cam Patterson, James R. Bain, Robert D. Stevens, Olga R. Ilkayeva, Christopher B. Newgard, and Jonathan C. Schisler. Adverse Effects of Fenofibrate in Mice Deficient in the Protein Quality Control Regulator, CHIP. *Journal of Cardiovascular Development and Disease*, 5(3), August 2018. ISSN 2308-3425. doi: 10.3390/jcdd5030043.
31. Dongkai Guo, Zheng Ying, Hongfeng Wang, Dong Chen, Feng Gao, Haigang Ren, and Guanghui Wang. Regulation of autophagic flux by CHIP. *Neuroscience Bulletin*, 31(4): 469–479, July 2015. ISSN 1673-7067. doi: 10.1007/s12264-015-1543-7.
32. Qi Wu, Hanne B. Moeller, Dönté A. Stevens, Rebekah Sanchez-Hodge, Gabrielle Childers, Marleen L. A. Kortenoever, Lei Cheng, Lena L. Rosenbaek, Carrie Rubel, Cam Patterson, Trairak Pititkun, Jonathan C. Schisler, and Robert A. Fenton. CHIP Regulates Aquaporin-2 Quality Control and Body Water Homeostasis. *Journal of the American Society of Nephrology: JASN*, December 2017. ISSN 1533-3450. doi: 10.1681/ASN.2017050526.
33. Randy J. Chandler, Ian M. Williams, Alana L. Gibson, Cristin D. Davidson, Arturo A. Incao, Brandon T. Hubbard, Forbes D. Porter, William J. Pavan, and Charles P. Venditti. Systemic



- AAV9 gene therapy improves the lifespan of mice with Niemann-Pick disease, type C1. *Human Molecular Genetics*, 26(1):52–64, January 2017. ISSN 0964-6906. doi: 10.1093/hmg/ddw367.
34. Felipe Cabral-Miranda, Elisa Nicoloso-Simões, Juliana Adão-Novaes, Vince Chiodo, William W. Hauswirth, Rafael Linden, Luciana Barreto Chiarini, and Hilda Petrs-Silva. rAAV8-733-Mediated Gene Transfer of CHIP/Stub-1 Prevents Hippocampal Neuronal Death in Experimental Brain Ischemia. *Molecular Therapy*, 25(2):392–400, February 2017. ISSN 1525-0016. doi: 10.1016/j.ymthe.2016.11.017.
  35. Daniel R. Scoles, Pratap Meera, Matthew D. Schneider, Sharan Paul, Warunee Dansithong, Karla P. Figueroa, Gene Hung, Frank Rigo, C. Frank Bennett, Thomas S. Otis, and Stefan M. Pulst. Antisense oligonucleotide therapy for spinocerebellar ataxia type 2. *Nature*, 544(7650):362–366, 2017. ISSN 1476-4687. doi: 10.1038/nature22044.
  36. José Gazulla, Silvia Izquierdo-Alvarez, Esther Sierra-Martínez, María Eugenia Marta-Moreno, and Sara Alvarez. Inaugural cognitive decline, late disease onset and novel STUB1 variants in SCAR16. *Neurological Sciences: Official Journal of the Italian Neurological Society and of the Italian Society of Clinical Neurophysiology*, 39(12):2231–2233, December 2018. ISSN 1590-3478. doi: 10.1007/s10072-018-3545-5.
  37. Burcu Turkgenç, Burcin Sanlidag, Amber Eker, Asli Giray, Ozgur Kutuk, Cengiz Yakicier, Aslıhan Tolun, and Sehime G. Temel. STUB1 polyadenylation signal variant AACAAA does not affect polyadenylation but decreases STUB1 translation causing SCAR16. *Human Mutation*, 39(10):1344–1348, October 2018. ISSN 1098-1004. doi: 10.1002/humu.23601.
  38. Adolfo M. García, Sofia Abrevaya, Giselle Kozono, Indira García Cordero, Marta Córdoba, Marcelo Andrés Kauffman, Ricardo Pautassi, Edinson Muñoz, Lucas Sedeño, and Agustín Ibáñez. The cerebellum and embodied semantics: evidence from a case of genetic ataxia due to STUB1 mutations. *Journal of Medical Genetics*, 54(2):114–124, 2017. ISSN 1468-6244. doi: 10.1136/jmedgenet-2016-104148.
  39. Toshitaka Kawarai, Ryosuke Miyamoto, Yoshimitsu Shimatani, Antonio Orlacchio, and Ryuji Kaji. Choreoathetosis, Dystonia, and Myoclonus in 3 Siblings With Autosomal Recessive Spinocerebellar Ataxia Type 16. *JAMA neurology*, 73(7):888–890, 2016. ISSN 2168-6157. doi: 10.1001/jamaneurol.2016.0647.
  40. David Genis, Sara Ortega-Cubero, Hector San Nicolás, Jordi Corral, Josep Gardenyes, Laura de Jorge, Eva López, Berta Campos, Elena Lorenzo, Raúl Tonda, Sergi Beltran, Montserrat Negre, María Obón, Brigitte Beltran, Laura Fàbregas, Berta Alemany, Fabián Márquez, Lluís Ramió-Torrentà, Jordi Gich, Víctor Volpini, and Pau Pastor. Heterozygous STUB1 mutation causes familial ataxia with cognitive affective syndrome (SCA48). *Neurology*, 91(21):e1988–e1998, November 2018. ISSN 1526-632X. doi: 10.1212/WNL.0000000000006550.
  41. Matthias Synofzik, Hélène Puccio, Fanny Mochel, and Ludger Schöls. Autosomal Recessive Cerebellar Ataxias: Paving the Way toward Targeted Molecular Therapies. *Neuron*, 101(4): 560–583, February 2019. ISSN 1097-4199. doi: 10.1016/j.neuron.2019.01.049.

DRAFT

**Table 1.** Patient variables

| Trait                               | Abundance (N = 24)    | P      |
|-------------------------------------|-----------------------|--------|
| Hypogonadism (yes)                  | 17%                   | 0.0006 |
| Increased tendon reflex (yes)       | 75%                   | 0.0122 |
| Ancestry (AMR, SAS, MENA, EUR, EAS) | 4%, 4%, 25%, 33%, 33% | 0.0126 |
| Cognitive dysfunction (yes)         | 71%                   | 0.0382 |
| Onset age (year)                    | 17 (10)               | 0.0674 |
| SARA (score)                        | 18.5 (16.4)           | 0.1413 |
| Homozygosity (yes)                  | 46%                   | 0.6829 |
| Sex (male)                          | 54%                   | 0.6829 |

Abundance for each trait is represented by either the percentage or median (and interquartile range) for categorical or continuous variables, respectively. Super populations for ancestry: AMR = Ad Mixed American, SAS = South Asian, MENA = Middle Eastern North African, EUR = European, EAS = East Asian. SARA = Scale for the Assessment and Rating of Ataxia.

**Table 2.** Patient variables

| Trait                               | Abundance (N = 24)    | P      |
|-------------------------------------|-----------------------|--------|
| Hypogonadism (yes)                  | 17%                   | 0.0006 |
| Increased tendon reflex (yes)       | 75%                   | 0.0122 |
| Ancestry (AMR, SAS, MENA, EUR, EAS) | 4%, 4%, 25%, 33%, 33% | 0.0126 |
| Cognitive dysfunction (yes)         | 71%                   | 0.0382 |
| Onset age (year)                    | 17 (10)               | 0.0674 |
| SARA (score)                        | 18.5 (16.4)           | 0.1413 |
| Homozygosity (yes)                  | 46%                   | 0.6829 |
| Sex (male)                          | 54%                   | 0.6829 |

Abundance for each trait is represented by either the percentage or median (and interquartile range) for categorical or continuous variables, respectively. Super populations for ancestry: AMR = Ad Mixed American, SAS = South Asian, MENA = Middle Eastern North African, EUR = European, EAS = East Asian. SARA = Scale for the Assessment and Rating of Ataxia.

**Table 3.** Analysis and modeling of SARA with clinical variables

| Variable                            | Statistic          | P     | Model | Coefficient                               |
|-------------------------------------|--------------------|-------|-------|-------------------------------------------|
| Cognitive dysfunction (yes)         | 13.8               | 0.002 | Y     | 4.9303                                    |
| Ancestry (AMR, SAS, MENA, EUR, EAS) | 4.13 <sup>a</sup>  | 0.032 | Y     | -1.4603, 0.7768, -1.2308, 4.1984, -3.0372 |
| Increased tendon reflex (yes)       | 6.56               | 0.199 | Y     | 2.3424                                    |
| Homozygosity (yes)                  | -4.38              | 0.328 | N     | -1.5642                                   |
| Onset age (year)                    | -0.08 <sup>b</sup> | 0.721 | N     | -0.2934                                   |
| Sex (male)                          | 1.19               | 0.792 | N     | 0.4248                                    |
| Hypogonadism (yes)                  | 1.00               | 0.869 | N     | 0.3573                                    |

Student's t tests were used to calculate the difference (statistic) and P value between SARA and each variable, unless otherwise indicated. Variables that were included in the regression modeling are indicated as well as the beta coefficients from the initial fit. Scale for the Assessment and Rating of Ataxia. Super populations for ancestry: AMR = Ad Mixed American, SAS = South Asian, MENA = Middle Eastern North African, EUR = European, EAS = East Asian.

<sup>a</sup>ANOVA was used and the F ratio is provided as the statistic

<sup>b</sup>Linear regression was used and the beta is provided as the statistic

**Table 4.** Analysis of SCAR16 mutation location with biochemical properties of the encoded mutant CHIP protein

| Biochemical property  | F ratio | P      |
|-----------------------|---------|--------|
| $B_{\max}$            | 10.7    | 0.0055 |
| %chain formation      | 9.3     | 0.0053 |
| %HSP70 ubiquitination | 5.2     | 0.0281 |
| $K_D$                 | 1.5     | 0.2871 |
| $T_m$                 | 0.6     | 0.5430 |
| %expression           | 0.1     | 0.8658 |

The F ratio and P value from ANOVA testing the three domains of CHIP with the variance of biochemical properties.  $B_{\max}$  = amount of binding,  $K_D$  = equilibrium dissociation constant.  $T_m$  = thermal melting temperature.



**Table 5.** Analysis and modeling age of onset and SARA with biochemical properties of mutant CHIP proteins

| Variable              | Onset (y)          |          |       |             | SARA                |          |       |             |
|-----------------------|--------------------|----------|-------|-------------|---------------------|----------|-------|-------------|
|                       | Statistic          | <i>P</i> | Model | Coefficient | Statistic           | <i>P</i> | Model | Coefficient |
| %chain formation      | 0.182              | 0.0001   | Y     | 3.80        | 0.046               | 0.2865   | Y     | 0.78        |
| $B_{\max}$            | -0.286             | 0.0044   | Y     | -4.53       | -0.190              | 0.1014   | Y     | -0.67       |
| $K_D$                 | -0.148             | 0.6203   | Y     | 0.46        | -0.715              | 0.0228   | Y     | -0.91       |
| Oligomeric (yes)      | 4.066 <sup>a</sup> | 0.3372   | Y     | 5.77        | -9.083 <sup>a</sup> | 0.0070   | Y     | -1.73       |
| %HSP70 ubiquitination | 0.071              | 0.5862   | Y     | -0.29       | 0.204               | 0.0559   | Y     | 0.70        |
| $T_m$                 | -0.503             | 0.3170   | N     | N/A         | 0.665               | 0.1081   | N     | N/A         |
| %expression           | 0.020              | 0.7916   | N     | N/A         | -0.056              | 0.3643   | N     | N/A         |

Linear regression was used to calculate the beta (statistic) and *P* value between SARA or Onset with the indicated variables, unless otherwise indicated. Variables that were included in the regression modeling are indicated as well as the beta coefficients from the initial fit. SARA = Scale for the Assessment and Rating of Ataxia,  $B_{\max}$  = amount of HSP70 binding,  $K_D$  = equilibrium dissociation constant.  $T_m$  = thermal melting temperature.

<sup>a</sup>T test was used and the difference reported as the statistic

**Table 6.** Monte Carlo simulations of onset and SARA in SCAR16 using biochemical properties of mutant CHIP protein

|                       | %HSP70 ub | %chain | $K_D$ | $B_{\max}$ | Onset (y) | SARA |
|-----------------------|-----------|--------|-------|------------|-----------|------|
| wild-type CHIP        | 73.1%     | 100%   | 2.9   | 204        | N/A       | N/A  |
| <b>Simulation</b>     |           |        |       |            |           |      |
| SCAR16                | 44%       | 70%    | 7.8   | 212        | 20.6      | 18.8 |
| SCAR16 <sub>opt</sub> | 7.2%      | 15%    | 17    | 217        | 27.8      | 10.6 |

The values of %HSP70 ubiquitination (ub), %ubiquitin chain formation, equilibrium dissociation constant ( $K_D$ ), and amount of HSP70 binding ( $B_{\max}$ ) for wild-type CHIP is provided. The results of modeling age of onset and SARA using the experimental biochemical data of mutant CHIP proteins (SCAR16) compared to the model optimized to reduce disease severity (SCAR16<sub>opt</sub>) are indicated.

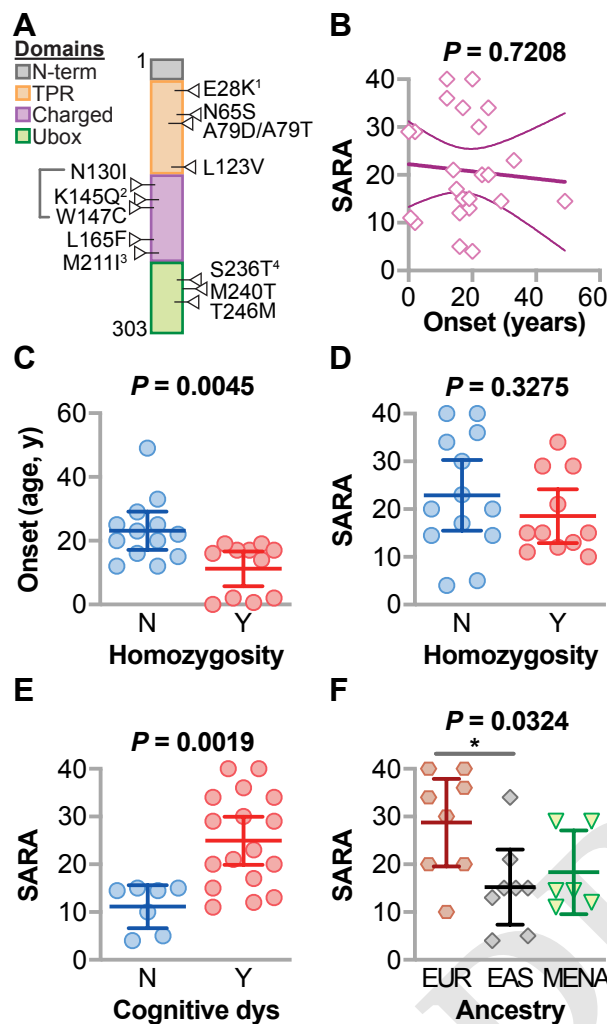

**Fig. 1.** Relationship between SCAR16 clinical variables. (A) Locations of the biochemically characterized SCAR16 mutations across the various functional domains of CHIP. Compound mutations with a second pre-terminal stop codon allele are indicated: <sup>1</sup>K144\*, <sup>2</sup>Y230Cfx\*8, <sup>3</sup>E238\*, <sup>4</sup>Y207\*. (B) Regression analysis of age of onset and SARA summarized by the best fit line and the 95% confidence interval. (C) Age of onset and (D) SARA score of SCAR16 patients stratified by homozygosity as well as (E) SARA score of SCAR16 patients stratified by cognitive dysfunction (dys); data are represented by dot plot and summarized by the mean  $\pm$  95% confidence interval, analyzed by t test. (F) SARA score of SCAR16 patients stratified by ancestry; data are represented by dot plot and summarized by the mean  $\pm$  95% confidence interval, analyzed by ANOVA: \*  $P < 0.05$  via Tukey post hoc test.

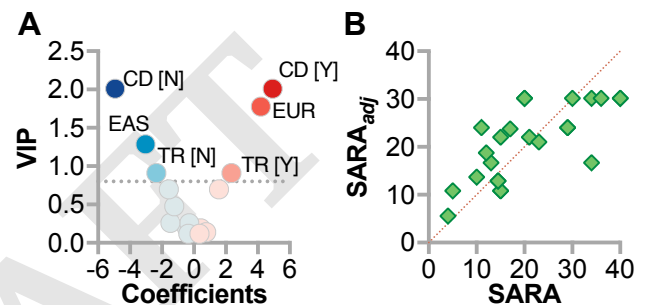

**Fig. 2.** Multivariate regression model of SARA in SCAR16 patients. (A) Model coefficients and their variable importance in projection values from PLS regression analysis represented by scatter plot: CD = cognitive dysfunction, TR = tendon reflex, Y = yes, N = no, EAS = East Asian ancestry, EUR = European ancestry. The dotted line represents the VIP cutoff for inclusion into the final model. (B) Actual SARA by predicted SARA (SARA<sub>adj</sub>) plot of the PLS model of each SCAR16 patient

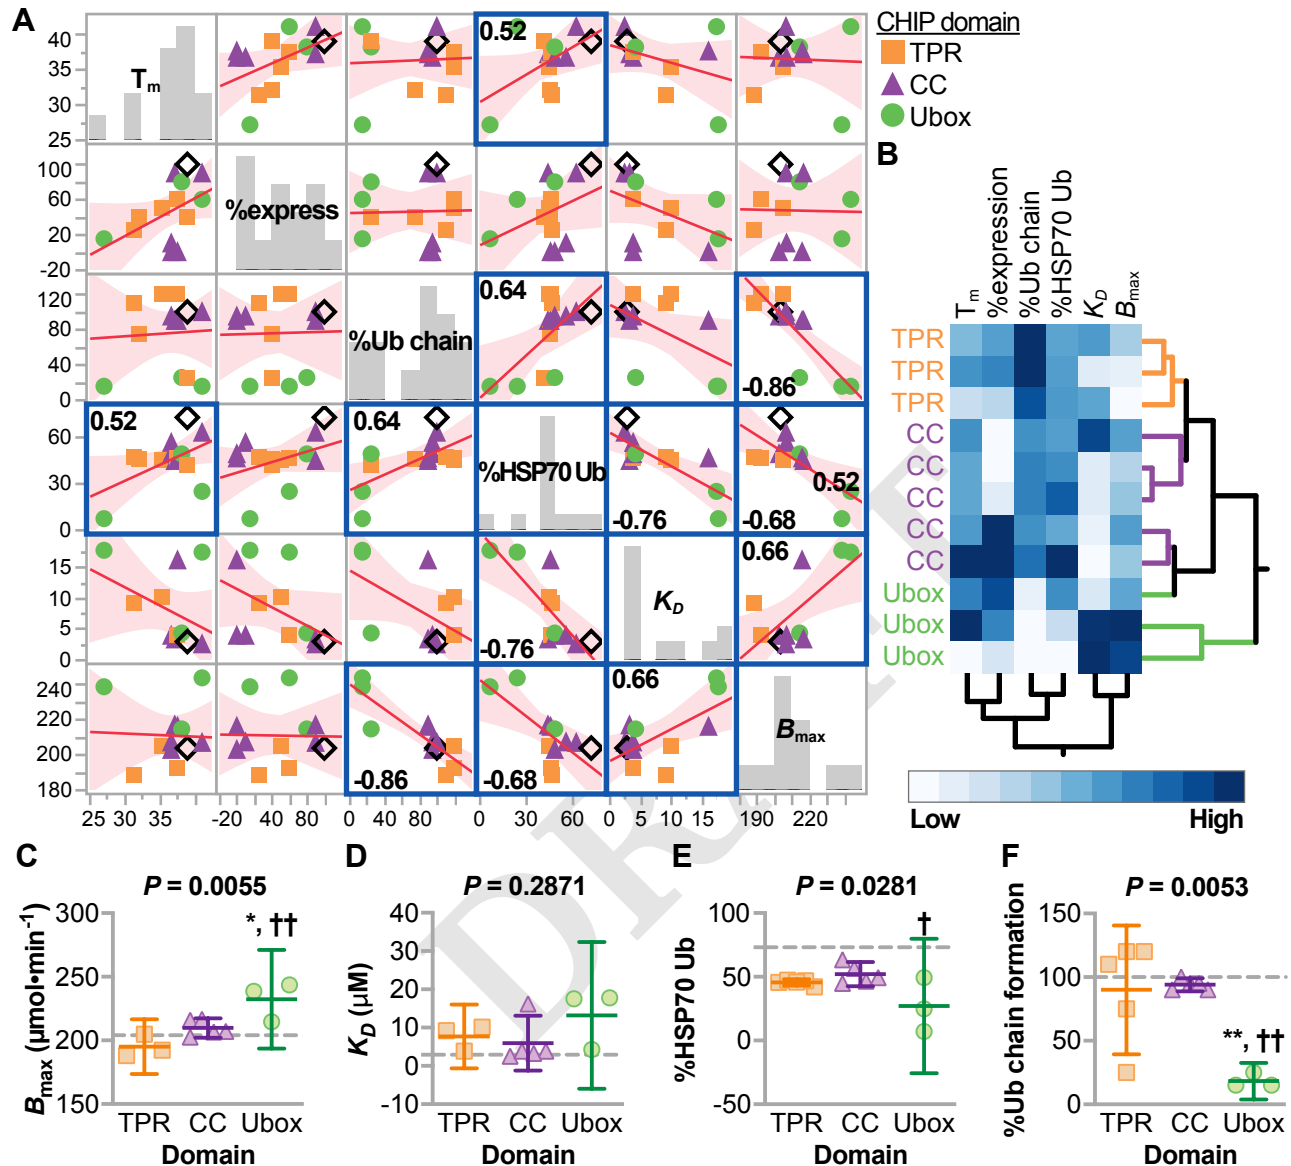

**Fig. 3.** Domain-specific changes in the biochemistry of mutant CHIP proteins. (A) Multivariate correlations of the biochemical properties of mutant CHIP proteins represented by scatter plot and summarized by the best fit line and the 95% confidence interval; highlighted correlations indicate the Pearson correlation coefficients ( $\rho$ )  $< 10\%$  FDR. (B) Unsupervised hierarchical clustering of the biochemical variables from mutant CHIP proteins identified by the domains harboring the mutation. (C - F) Biochemical variables stratified by the location of the mutation; data are represented by dot plot and summarized by the mean  $\pm$  95% confidence interval, analyzed by ANOVA: \*, \*\* indicate  $P < 0.05$ , or 0.001 compared to the CC domain, †, †† indicate  $P < 0.05$ , or 0.001 compared to the TPR domain via Tukey post hoc test. The dashed lines indicate levels measured with CHIP-WT levels.

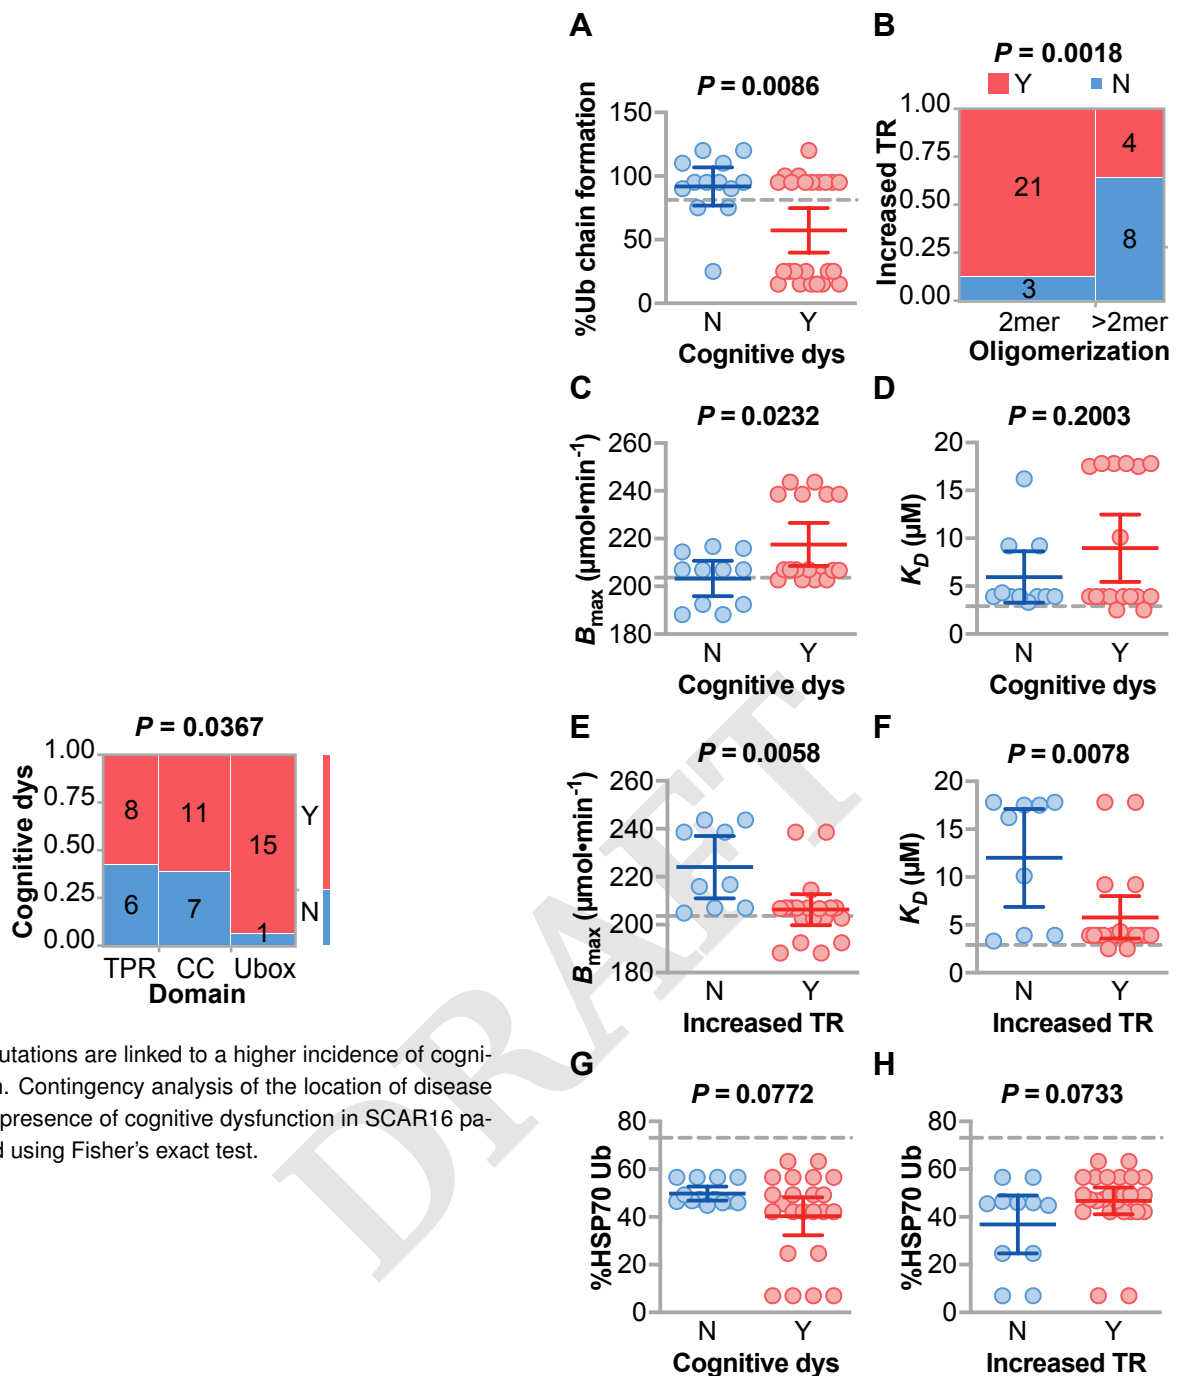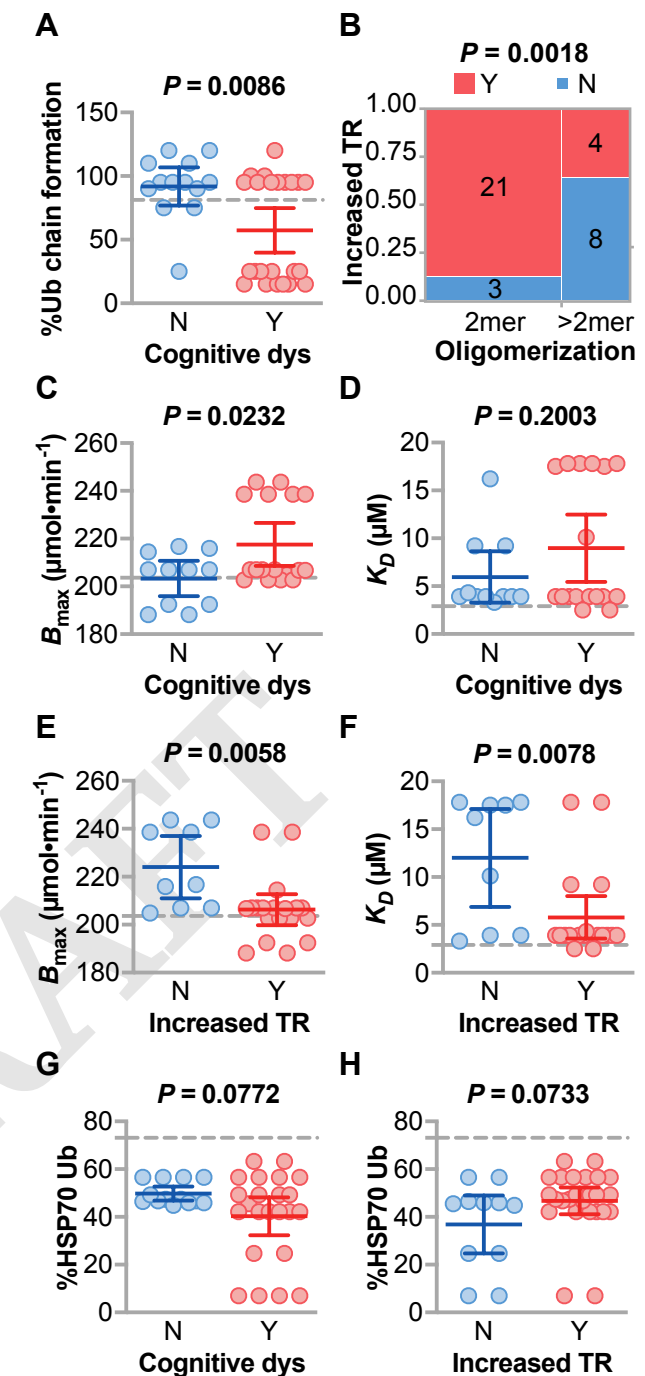



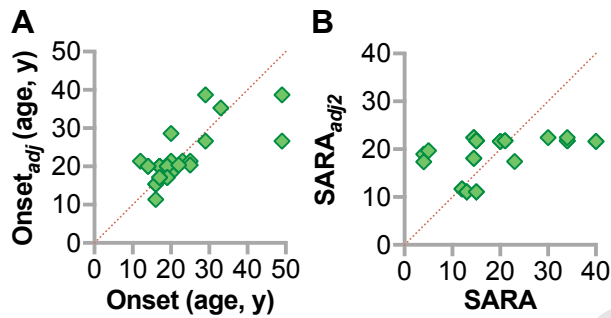

**Fig. 6.** Regression model performance of age of onset and SARA as a function of the biochemical properties of mutant CHIP proteins. (A) Scatter plot of actual age of onset by predicted onset (Onset<sub>adj</sub>) via the PLS model. (B) Scatter plot of actual SARA by predicted SARA (SARA<sub>adj2</sub>) plot of the PLS model.

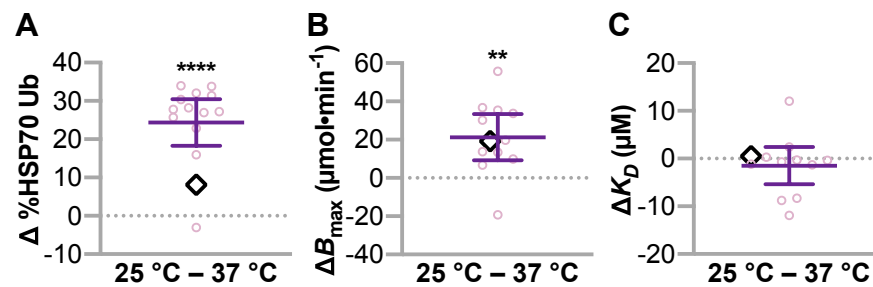

**Fig. 7.** Temperature-dependent changes in the biochemical properties of mutant CHIP proteins. The absolute change ( $\Delta$ ) in (A) HSP70 ubiquitination, (B)  $B_{\max}$ , and (C)  $K_D$  at 25 °C compared to 37 °C. The change to wild-type CHIP is identified by the diamond and the mutant proteins are represented by dot plot and summarized by the mean  $\pm$  95% confidence interval: \*\*, \*\*\*\* correspond to  $P < 0.01$ , 0.0001 via one sample t test versus the hypothetical value of 0 represented by the dotted line.

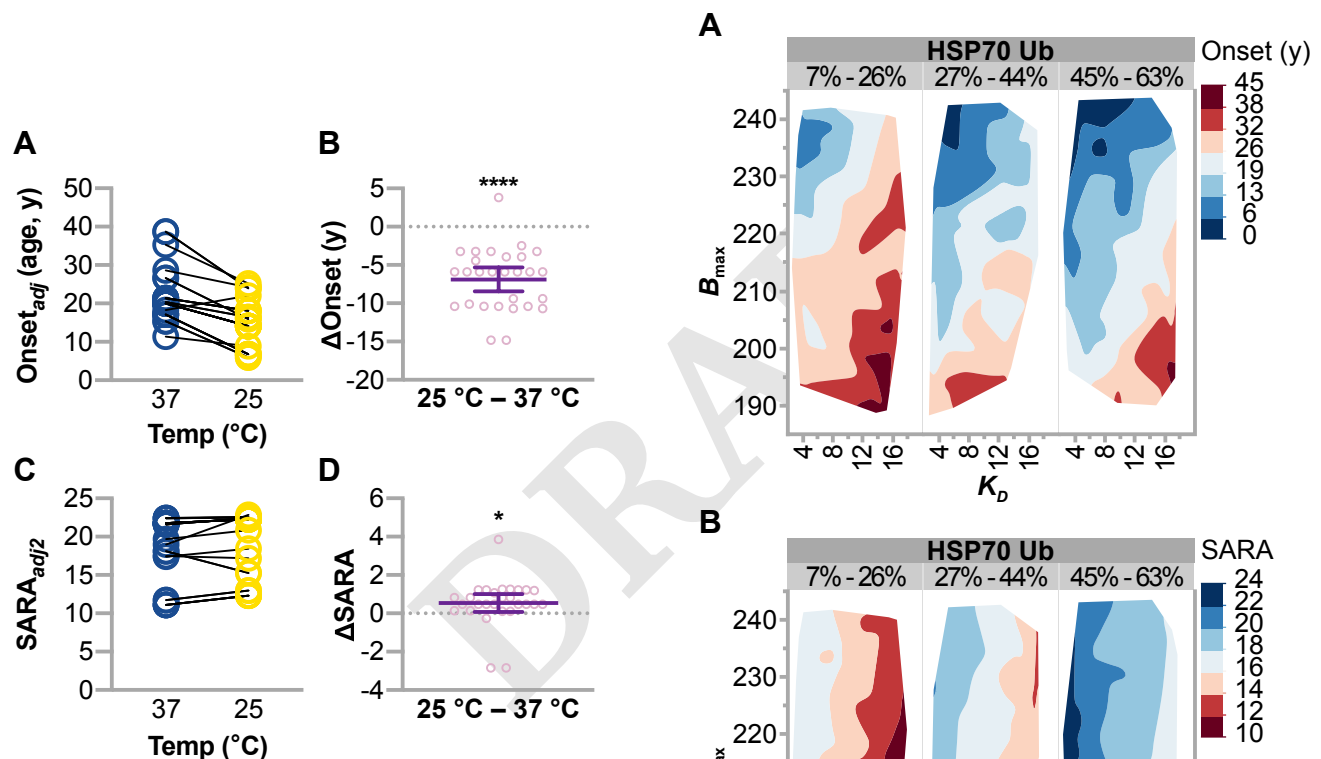

**Fig. 8.** Predicted age of onset and SARA with temperature-dependent changes in mutant CHIP proteins. Model results of (A)  $\text{Onset}_{\text{adj}}$  or (C)  $\text{SARA}_{\text{adj}2}$  via the PLS model at 37 °C and 25 °C with each allele represented by a before-after plot. The absolute change ( $\Delta$ ) in (B)  $\text{Onset}_{\text{adj}}$  or (D)  $\text{SARA}_{\text{adj}2}$  at 25 °C compared to 37 °C. Each allele is represented by dot plot and summarized by the mean  $\pm$  95% confidence interval: \*, \*\*\*\* correspond to  $P < 0.05$ , 0.0001 via one sample t test versus the hypothetical value of 0 represented by the dotted line.

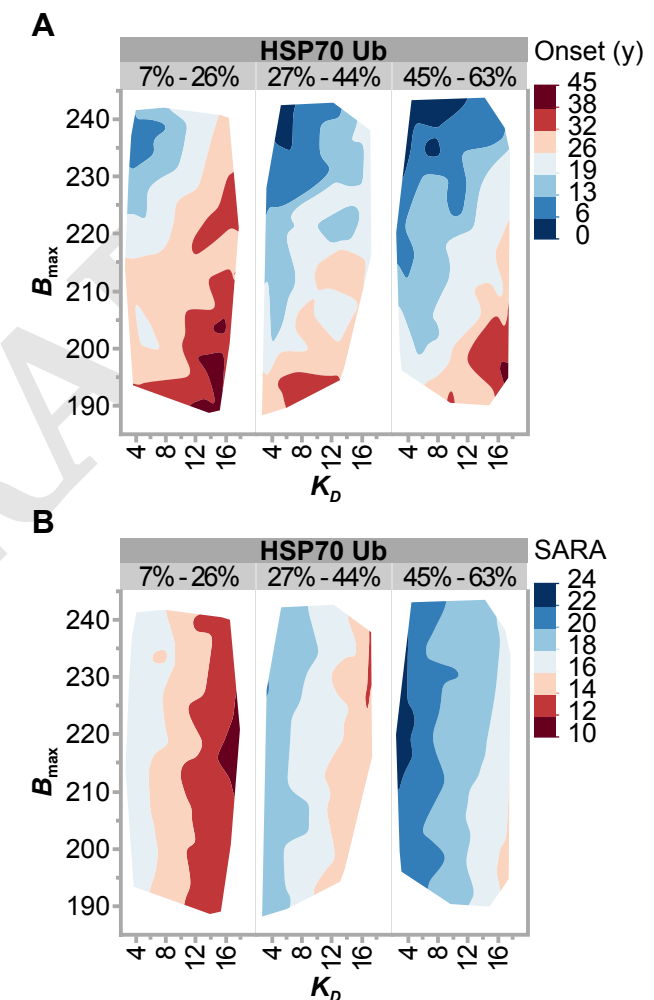

**Fig. 9.** Simulation results of CHIP biochemical properties that improve disease phenotypes. Simulations of (A) age of onset and (B) SARA, represented as contour plots of  $B_{\max}$  as a function of and  $K_D$  grouped by the percentage of HSP70 ubiquitination relative to wild-type CHIP.
